# Supplementary material for: DNA Methyltransferase Inhibition Promotes Th1 Polarization in Human CD4+CD25high FOXP3+ Regulatory T Cells but Does Not Affect Their Suppressive Capacity
Source: Hindawi journal article supplement (doi:10.1155/2018/4973964), 2018-01-01
Supplement: f1 [file 4973964.f1.pdf]

A

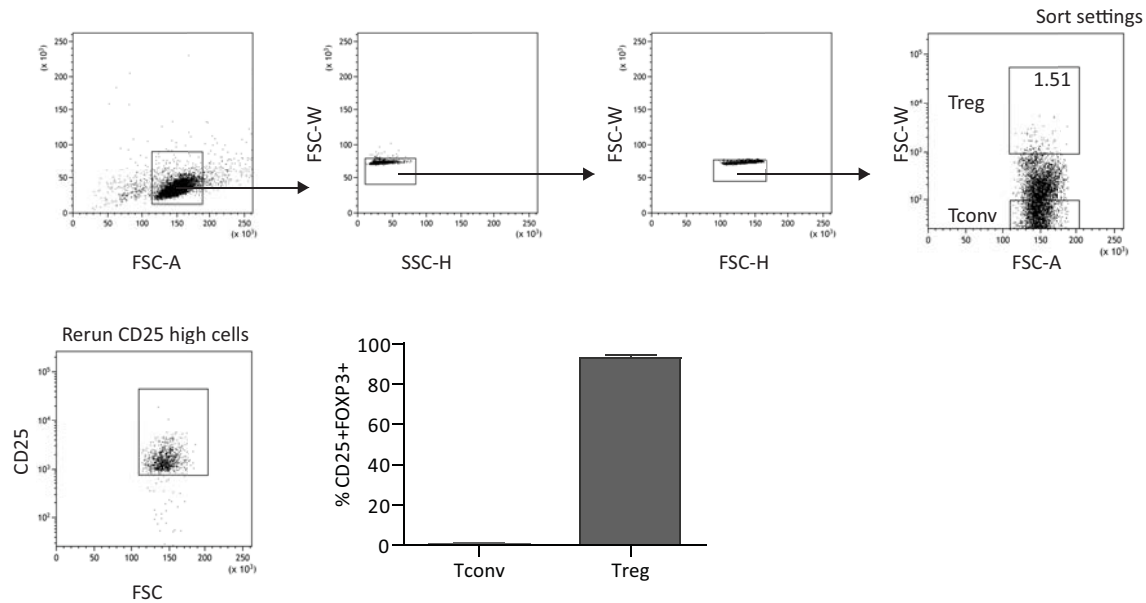

B

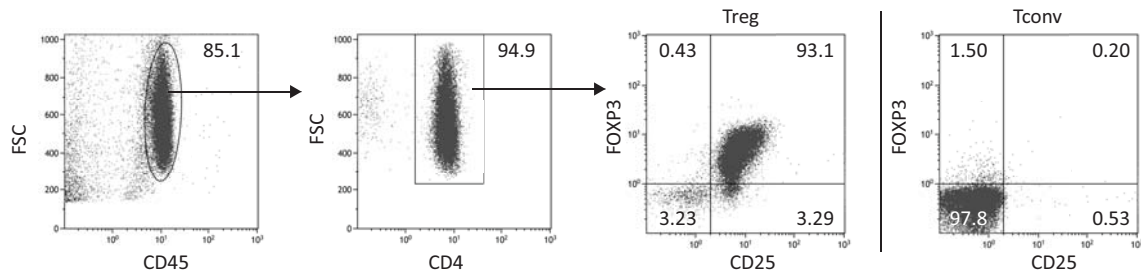

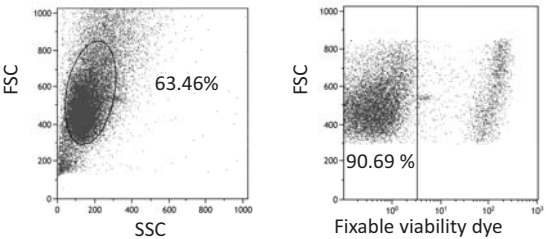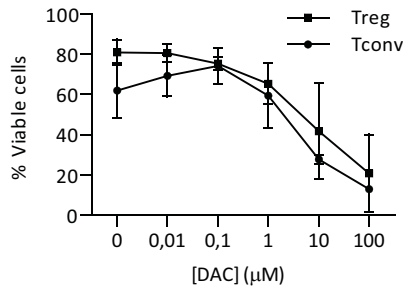

| pt # | Age | Diagnosis                  | Cycles | Reason of discontinuation |
|------|-----|----------------------------|--------|---------------------------|
| 1    | 71  | CMML-2                     | 2      | Died of hart failure      |
| 2    | 79  | AML multilineage dysplasia | >5     | Ongoing                   |
| 3    | 68  | CMML-2                     | 4      | Stop due to toxicity      |
| 4    | 70  | AML multilineage dysplasia | >5     | Ongoing                   |
| 5**  | 70  | MDS-t                      | >5     | Ongoing                   |
| 6    | 76  | AML                        | >5     | Ongoing                   |
| 7    | 70  | AML                        | 3      | Ongoing, quit study       |
| 8    | 53  | CMML-1                     | 4      | Ongoing, quit study       |
| 9    | 78  | MDS-RAEB2                  | 3      | Stop due to toxicity      |
| 10*  | 77  | CMML-2                     | >5     | Ongoing                   |
| 11   | 97  | MDS-RAEB2                  | 5      | Palliative                |
| 12   | 76  | MDS-RAEB-1                 | >5     | Ongoing                   |
| 13   | 79  | AML M2                     | >5     | Ongoing                   |
| 14   | 82  | MDS-RAEB-1                 | >5     | Ongoing                   |
| 15** | 71  | AML                        | 2      | Changed to other study    |

Patients with >5 cycles are included in the 5 cycles analysis

\* Pt 10 was excluded from the analysis because no blood was drawn in first cycle

\*\* No cytokines measured before start of treatment
